# Supplementary material for: Aqueous phase- and size-controlled synthesis, and secondary assemblies of CdS nanocrystals at room temperature
Source: Royal Society of Chemistry journal article supplement (doi:10.1039/d1ce01276b), 2021-12-08
Supplement: d1ce01276b1.pdf [file d1ce01276b1.pdf]

## Supplementary Materials for

### Aqueous phase- and size-controlled synthesis, and secondary assemblies of CdS nanocrystals at room temperature

Pengfei Hu<sup>†1</sup>, Dong Zhou<sup>†</sup>, Shiqing Xu<sup>†</sup>, Qianru Ma<sup>†</sup>, Jiaqi Yin<sup>‡</sup>, Yali Cao<sup>‡</sup>, Jing Xu<sup>†\*</sup>

<sup>†</sup>Laboratory for Microstructures, Shanghai University, Shanghai 200444, P. R. China.

<sup>‡</sup> Ningbo Institute of Technology and Engineering, Chinese Academy of Sciences, Zhenjiang 315201, P. R. China.

<sup>†</sup> key Laboratory of Energy Materials Chemistry, Ministry of Education, Key Laboratory of Advanced Functional Materials, Xinjiang University, Urumqi, Xinjiang, 830046, China

---

<sup>1</sup> Corresponding authors. telephone/Fax: +86-21-66135030  
E-mail: [hpf-hqx@shu.edu.cn](mailto:hpf-hqx@shu.edu.cn) (P.F. Hu), [xujingshu@shu.edu.cn](mailto:xujingshu@shu.edu.cn) (J. Xu).

**Table S1**

| item \ pH     | 2.5                   | 3.5                   | 5.0                  | 6.5                   | 7.5                   | 8.5                   | 9.5                   |
|---------------|-----------------------|-----------------------|----------------------|-----------------------|-----------------------|-----------------------|-----------------------|
| $K'_{MY}$     | 4.56                  | 6.98                  | 10.01                | 12.54                 | 13.68                 | 14.69                 | 15.53                 |
| $C_{Cd^{2+}}$ | 2.23*<br>$10^{-3.78}$ | 2.23*<br>$10^{-4.99}$ | 2.23*<br>$10^{-6.5}$ | 2.23*<br>$10^{-7.77}$ | 2.23*<br>$10^{-8.35}$ | 2.23*<br>$10^{-8.85}$ | 2.23*<br>$10^{-9.26}$ |

**Table S2**

| item \ pH     | 1.5                    | 4.5                    | 6.0                    | 7.5                    | 9.0                    |
|---------------|------------------------|------------------------|------------------------|------------------------|------------------------|
| $K'_{MY}$     | 17.85                  | 23.85                  | 27.85                  | 28.31                  | 29.08                  |
| $C_{Cd^{2+}}$ | 2.23*<br>$10^{-10.43}$ | 2.23*<br>$10^{-13.43}$ | 2.23*<br>$10^{-13.93}$ | 2.23*<br>$10^{-15.65}$ | 2.23*<br>$10^{-16.04}$ |

**Table S.** Conditional stability constants ( $K'_{MY}$ ) and cadmium ion concentration of cadmium ion complexes with different ligands at different pH values: Table S1) ethylenediaminetetraacetic acid disodium salt dihydrate (EDTA); Table S2) sulfosalicylic acid (SSA).

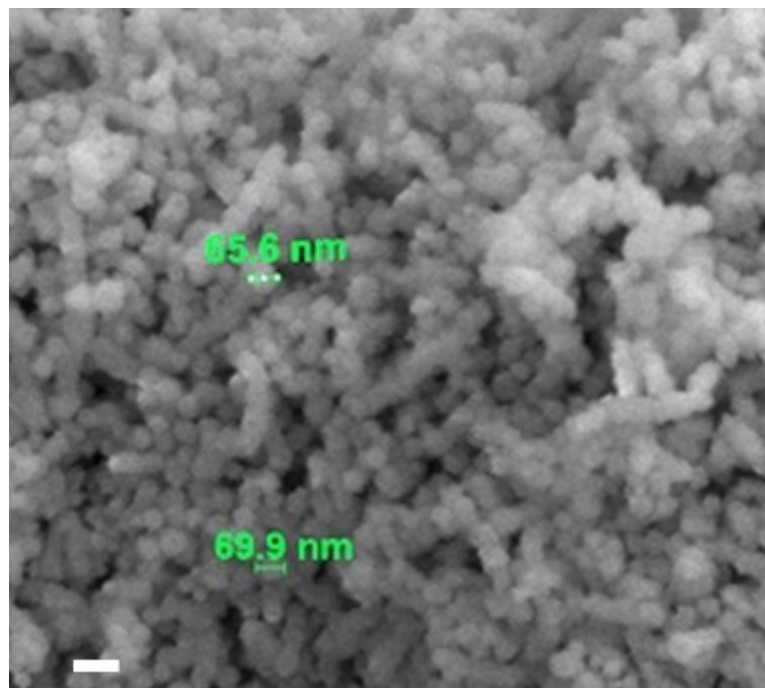

**Fig S1.** SEM images of CdS NCs synthesized with EN as stabilizer at pH = 7.5. Scale bars, 100 nm.

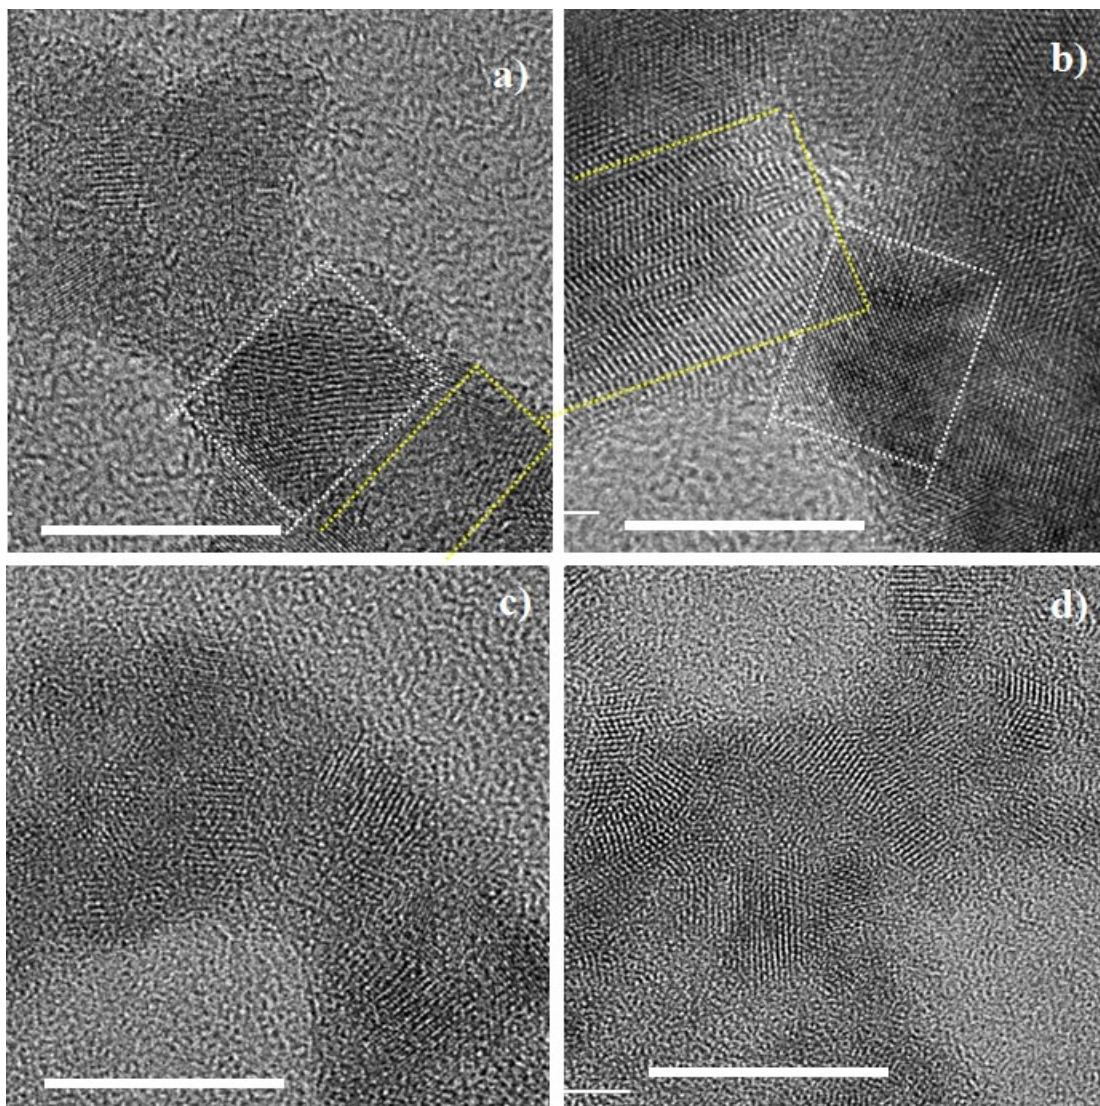

**Fig S2.** a, b, c, and d) HRTEM of joining regions of CdS single crystal chain. Scale bars, 10 nm.

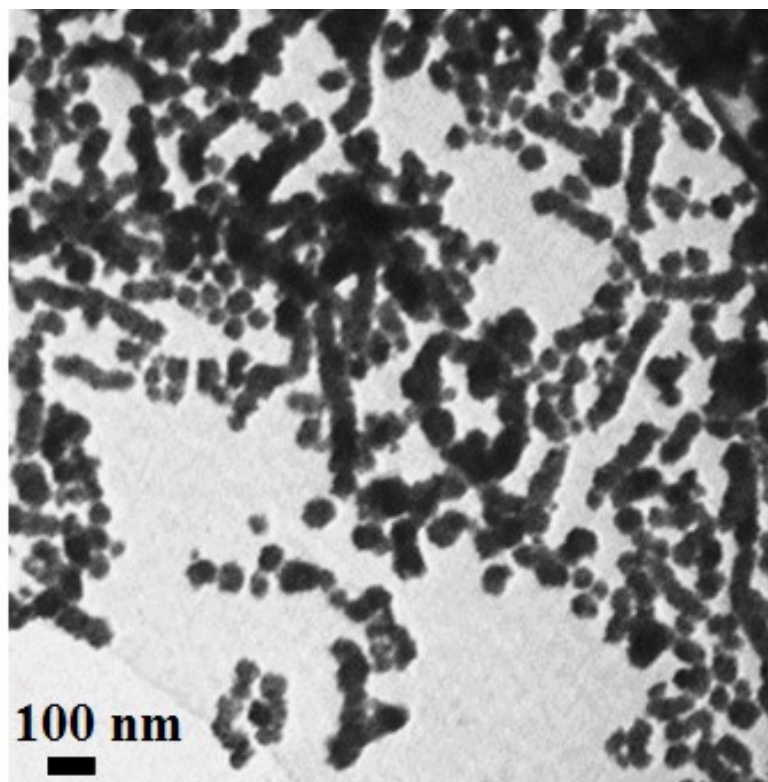

**Fig S3.** TEM images of CdS NCs synthesized with EN as stabilizer at 80 °C. Scale bars, 100 nm.

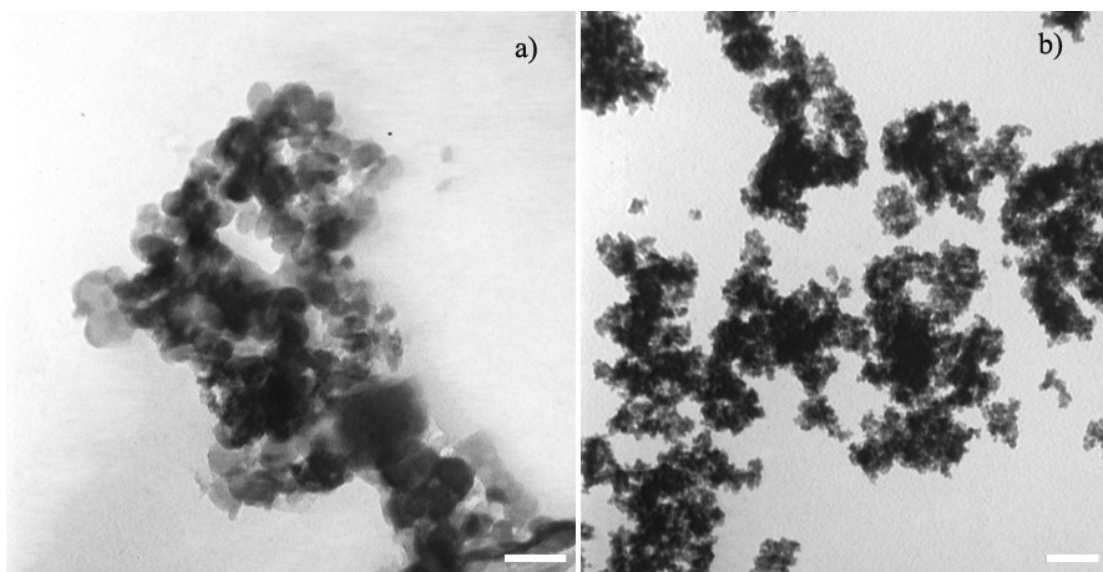

**Fig S4.** TEM images of CdS NCs synthesized with SSA as stabilizer at pH = 4.5 a), and 9.0 b).

Scale bars, 100 nm.

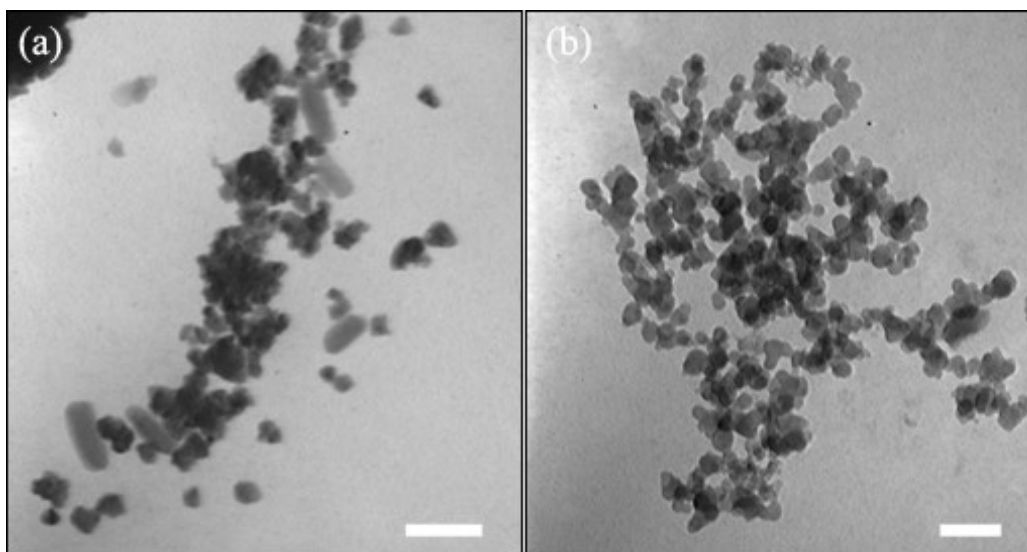

**Fig S5.** TEM images of CdS NCs prepared with ligand EDTA at pH = 7.5 a), and 9.5 b). Scale bars, 100 nm.
